# Supplementary material for: ECM2 and GLT8D2 in human pulmonary artery hypertension: fruits from weighted gene co-expression network analysis
Source: PubMed Central journal article supplement — J Thorac Dis. 2021 Apr;13(4):2242–54. doi: 10.21037/jtd-20-3069 (PMC8107565; doi:10.21037/jtd-20-3069), 2021-04
Supplement: jtd-13-04-2242-supplementary.pdf [file jtd-13-04-2242-supplementary.pdf]

Table S1 Hub gene in the black module

| Gene            | GS       | MM       | Spearman correlation coefficient | P.val | P.adj |
|-----------------|----------|----------|----------------------------------|-------|-------|
| <i>ARRB2</i>    | -0.58442 | 0.888651 | -0.365                           | 0.006 | 0.222 |
| <i>CD68</i>     | -0.35426 | 0.872196 | -0.297                           | 0.026 | 0.369 |
| <i>CTSB</i>     | -0.43065 | 0.862218 | -0.29                            | 0.03  | 0.369 |
| <i>FCER1G</i>   | -0.47179 | 0.855662 | -0.274                           | 0.041 | 0.369 |
| <i>G6PD</i>     | -0.58611 | 0.864425 | -0.239                           | 0.076 | 0.369 |
| <i>LAIR1</i>    | -0.38299 | 0.85962  | -0.264                           | 0.049 | 0.369 |
| <i>TKT</i>      | -0.50982 | 0.833433 | -0.255                           | 0.058 | 0.369 |
| <i>TRPC1</i>    | 0.537579 | -0.80247 | 0.245                            | 0.069 | 0.369 |
| <i>ADAP2</i>    | -0.52754 | 0.826758 | -0.201                           | 0.138 | 0.475 |
| <i>GBGT1</i>    | -0.45369 | 0.806934 | -0.181                           | 0.183 | 0.475 |
| <i>ITGAX</i>    | -0.39333 | 0.805234 | -0.208                           | 0.124 | 0.475 |
| <i>PGD</i>      | -0.62815 | 0.869171 | -0.203                           | 0.134 | 0.475 |
| <i>PIK3AP1</i>  | -0.46572 | 0.810135 | -0.185                           | 0.173 | 0.475 |
| <i>PKM</i>      | -0.43334 | 0.840774 | -0.196                           | 0.149 | 0.475 |
| <i>STXBP2</i>   | -0.53182 | 0.848441 | -0.185                           | 0.172 | 0.475 |
| <i>IFI30</i>    | -0.2682  | 0.823608 | -0.157                           | 0.248 | 0.57  |
| <i>LIMK1</i>    | -0.25766 | 0.810733 | -0.152                           | 0.263 | 0.57  |
| <i>SPI1</i>     | -0.48211 | 0.843326 | -0.154                           | 0.256 | 0.57  |
| <i>COLGALT1</i> | -0.33104 | 0.873574 | -0.146                           | 0.282 | 0.579 |
| <i>NCKAP1L</i>  | -0.31435 | 0.864211 | -0.126                           | 0.354 | 0.658 |
| <i>NLRC4</i>    | -0.63074 | 0.803129 | -0.13                            | 0.339 | 0.658 |
| <i>CD53</i>     | -0.49556 | 0.826321 | -0.108                           | 0.427 | 0.758 |
| <i>APBB1IP</i>  | -0.63169 | 0.839587 | -0.089                           | 0.515 | 0.769 |
| <i>DOCK2</i>    | -0.2554  | 0.804507 | -0.085                           | 0.532 | 0.769 |
| <i>FKBP15</i>   | -0.50056 | 0.845252 | -0.099                           | 0.47  | 0.769 |
| <i>NCF2</i>     | -0.46581 | 0.809243 | -0.092                           | 0.5   | 0.769 |
| <i>PTPN6</i>    | -0.38979 | 0.849464 | -0.093                           | 0.497 | 0.769 |
| <i>CTSD</i>     | -0.28275 | 0.807227 | -0.076                           | 0.576 | 0.775 |
| <i>ITGAM</i>    | -0.62322 | 0.815394 | -0.079                           | 0.56  | 0.775 |
| <i>NCF4</i>     | -0.59108 | 0.803119 | 0.066                            | 0.627 | 0.788 |
| <i>TWF2</i>     | -0.34806 | 0.826502 | -0.069                           | 0.613 | 0.788 |
| <i>CYBB</i>     | -0.39194 | 0.800834 | 0.058                            | 0.673 | 0.795 |
| <i>SHKBP1</i>   | -0.57217 | 0.834223 | -0.06                            | 0.662 | 0.795 |
| <i>MYO1F</i>    | -0.55671 | 0.832104 | -0.051                           | 0.709 | 0.813 |
| <i>ATP6V0D1</i> | -0.35684 | 0.82852  | -0.032                           | 0.816 | 0.896 |
| <i>SIGLEC9</i>  | -0.57612 | 0.810031 | -0.03                            | 0.827 | 0.896 |
| <i>ACP2</i>     | -0.48028 | 0.828447 | -0.004                           | 0.979 | 0.979 |
| <i>ITGB2</i>    | -0.44128 | 0.848766 | 0.011                            | 0.938 | 0.979 |
| <i>SYK</i>      | -0.45454 | 0.874867 | -0.005                           | 0.972 | 0.979 |

Genes in black module with MM >0.8, GS >0.2. Spearman correlation calculated the correlation coefficient between gene expression and mPAP. FDR was used for multiple testing correction. MM, module membership; GS, gene significance; mPAP, mean pulmonary artery pressure; FDR, false discovery rate.
